# Supplementary material
Source: Springer Nature journal article supplement (https://www.springermedizin.de/resource/supplementary/40478_2014_108_MOESM4_ESM.pdf/25658178)

**a**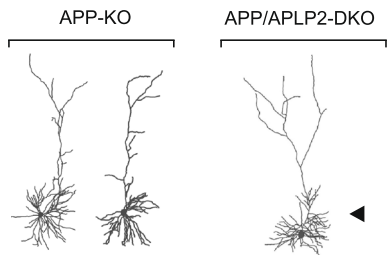**b**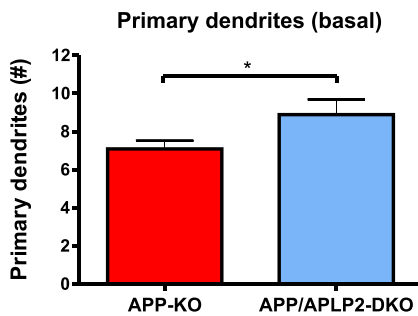**c**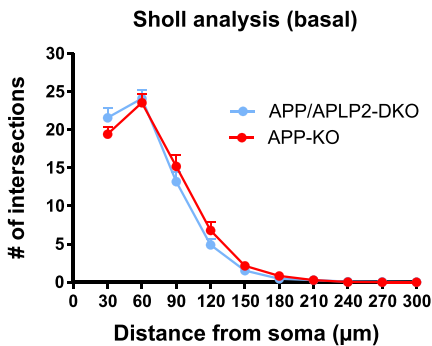**d**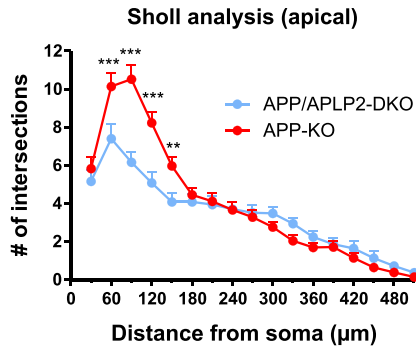**e**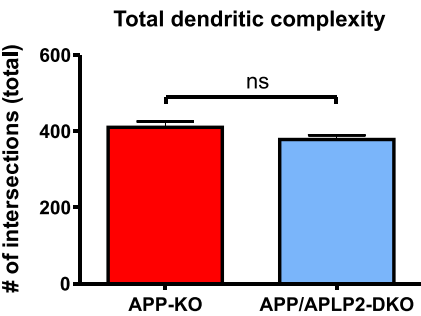**f**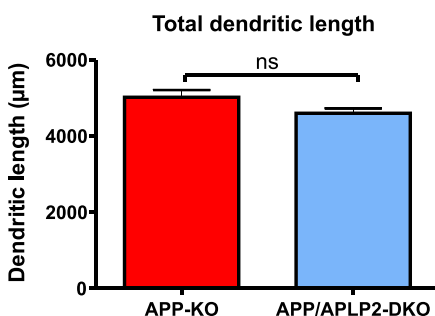

Supplement: MOESM4 [file 25658178]
